# Supplementary material for: Genetic Investigation of Aral Wild Common Carp Populations (Cyprinus carpio) Using ddRAD Sequencing
Source: MDPI journal article supplement (doi:10.3390/d13070295), 2021-06-28
Supplement: s1 [file s1]

# Supplementary File

## Genetic Investigation of Aral Wild Common Carp Populations (*Cyprinus carpio*) Using ddRAD Sequencing

Gulmira Shalgimbayeva <sup>1</sup>, Alexander Volkov <sup>2</sup>, Natalia Slobodova <sup>3</sup>, Fedor Sharko <sup>3,4</sup>, Svetlana Tsygankova <sup>3</sup>, Eugenia Boulygina <sup>3</sup>, Van Q. Nguyen <sup>5,6,\*</sup>, The T. Pham <sup>5</sup>, Duc T. Nguyen <sup>5</sup>, Saule Zh. Assylbekova <sup>1</sup>, Yakov Alekseev <sup>7,8</sup>, Artem Nedoluzhko <sup>9,\*</sup>, Jorge M. O. Fernandes <sup>9</sup> and Sergey Rastorguev <sup>3,\*</sup>

<sup>1</sup> LLP Isheries Research and Production Center (FRPC), Almaty 050016, Kazakhstan; shalgimbayeva@mail.ru (G.S.); assylbekova@mail.ru (S.Zh.A.)

<sup>2</sup> Russian Federal Research Institute of Fisheries and Oceanography (VNIRO), 107140 Moscow, Russia; alexavolkov@gmail.com

<sup>3</sup> National Research Center “Kurchatov Institute”, 123182 Moscow, Russia; nv.slobodova@gmail.com (N.S.); fedosic@gmail.com (F.S.); svetlana.tsygankova@gmail.com (S.T.); eugenia.bulygina@gmail.com (E.B.)

<sup>4</sup> Research Center of Biotechnology of the Russian Academy of Sciences, Institute of Bioengineering, 119071 Moscow, Russia

<sup>5</sup> Institute of Marine Environment and Resources, Vietnam Academy of Science and Technology, 18 Hoang Quoc Viet, Cau Giay, Hanoi 10000, Vietnam; thupt@imer.vast.vn (T.T.P.); thend@imer.vast.vn (D.T.N.)

<sup>6</sup> Faculty of Marine Science and Technology, Graduate University of Science and Technology, 10000 Hoang Quoc Viet Street 18, Hanoi, Vietnam

<sup>7</sup> LLC Syntol, 127434 Moscow, Russia; jalex01@mail.ru

<sup>8</sup> Institute for Analytical Instrumentation, Russian Academy of Science, 190103 St. Petersburg, Russia

<sup>9</sup> Faculty of Biosciences and Aquaculture, Nord University, 8049 Bodø, Norway; jorge.m.fernandes@nord.no

\* Correspondence: quannv@imer.vast.vn (V.Q.N.); artem.nedoluzhko@nord.no (A.N.); rastorgueff@gmail.com (S.R.)

### Supplementary Figures

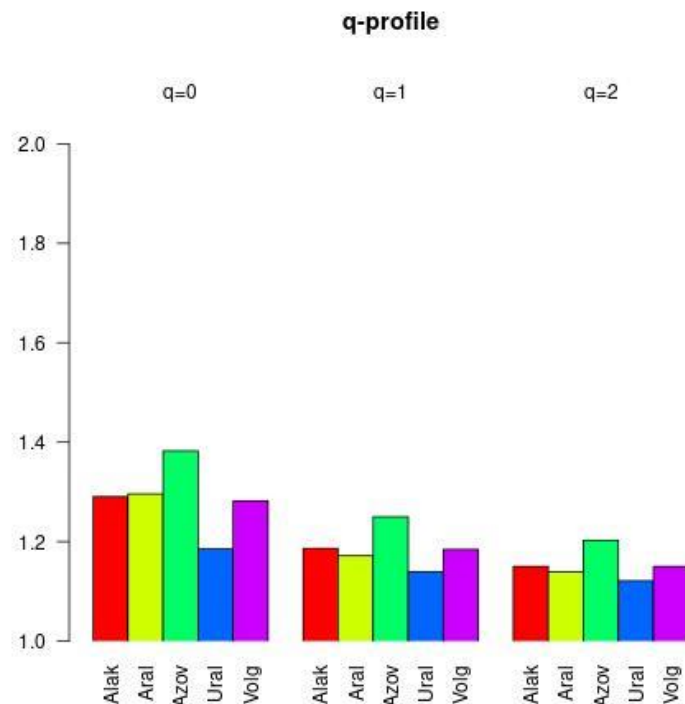

**Figure S1.** Common carp population diversity. Allelic richness ( $q = 0$ ), Shannon information ( $q = 1$ ), and heterozygosity ( $q = 2$ ).

## Supplementary Tables

**Table S1.** Number of generated reads and mapping statistics for the common carp specimens

| <b>Specimen Name</b> | <b>No. Illumina Reads Generated</b> | <b>No. Reads Mapped to Reference Genome</b> | <b>%, Mapped Reads</b> | <b>No. Uniquely Mapped Reads</b> | <b>%, Uniquely Mapped Reads</b> |
|----------------------|-------------------------------------|---------------------------------------------|------------------------|----------------------------------|---------------------------------|
| Alakol1              | 2,009,070                           | 1,990,466                                   | 99.07                  | 230,381                          | 11.47                           |
| Alakol2              | 1,692,112                           | 1,669,230                                   | 98.65                  | 186,118                          | 11.00                           |
| Alakol3              | 2,070,194                           | 2,047,469                                   | 98.90                  | 235,720                          | 11.39                           |
| Alakol4              | 1,781,198                           | 1,742,379                                   | 97.82                  | 198,410                          | 11.14                           |
| Alakol5              | 1,948,088                           | 1,897,780                                   | 97.42                  | 232,487                          | 11.93                           |
| Aral10               | 2,044,838                           | 2,012,814                                   | 98.43                  | 239,321                          | 11.70                           |
| Aral1                | 1,999,318                           | 1,978,571                                   | 98.96                  | 228,603                          | 11.43                           |
| Aral2                | 2,713,824                           | 2,678,436                                   | 98.70                  | 317,109                          | 11.68                           |
| Aral3                | 2,951,936                           | 2,917,012                                   | 98.82                  | 369,822                          | 12.53                           |
| Aral4                | 2,471,954                           | 2,431,831                                   | 98.38                  | 287,001                          | 11.61                           |
| Aral5                | 5,406,950                           | 2,834,084                                   | 52.42                  | 334,589                          | 6.19                            |
| Aral6                | 1,637,554                           | 1,614,247                                   | 98.58                  | 199,637                          | 12.19                           |
| Aral7                | 9,486                               | 8,535                                       | 89.97                  | 988                              | 10.42                           |
| Aral8                | 3,518,726                           | 3,481,451                                   | 98.94                  | 398,561                          | 11.33                           |
| Aral9                | 1,818,784                           | 1,794,939                                   | 98.69                  | 205,955                          | 11.32                           |
| Azov1                | 3,158,090                           | 3,124,899                                   | 98.95                  | 365,938                          | 11.59                           |
| Azov2                | 2,884,390                           | 2,858,068                                   | 99.09                  | 333,186                          | 11.55                           |
| Azov3                | 3,114,692                           | 3,086,376                                   | 99.09                  | 352,202                          | 11.31                           |
| Azov4                | 3,719,200                           | 3,685,328                                   | 99.09                  | 430,300                          | 11.57                           |
| Azov5                | 2,706,308                           | 2,679,379                                   | 99.00                  | 301,082                          | 11.13                           |
| Volga1               | 1,288,002                           | 1,271,933                                   | 98.75                  | 145,822                          | 11.32                           |
| Volga2               | 1,948,616                           | 1,927,603                                   | 98.92                  | 224,557                          | 11.52                           |
| Volga3               | 2,071,144                           | 2,054,428                                   | 99.19                  | 241,603                          | 11.67                           |
| Volga4               | 2,359,526                           | 2,339,876                                   | 99.17                  | 280,603                          | 11.89                           |
| Volga5               | 2,541,958                           | 2,510,295                                   | 98.75                  | 300,645                          | 11.83                           |
| Ural1                | 1,969,158                           | 1,944,763                                   | 98.76                  | 228,061                          | 11.58                           |
| Ural2                | 2,411,236                           | 2,390,965                                   | 99.16                  | 278,831                          | 11.56                           |
| Ural3                | 2,163,012                           | 2,145,268                                   | 99.18                  | 255,088                          | 11.79                           |
| Ural4                | 2,233,802                           | 2,207,159                                   | 98.81                  | 258,595                          | 11.58                           |
| Ural5                | 2,477,162                           | 2,455,581                                   | 99.13                  | 284,882                          | 11.5                            |

**Table S2.** Variation analysis. Mean allele count and mean heterozygosity for each common carp population

| Population Name | Mean reference Allele Count | Mean heterozygosity, % |
|-----------------|-----------------------------|------------------------|
| Aral            | 1.61194                     | 0.11174                |
| Alakol          | 1.61187                     | 0.11441                |
| Volga           | 1.61403                     | 0.11817                |
| Ural            | 1.61165                     | 0.09909                |
| Azov            | 1.61132                     | 0.15526                |
